# Supplementary material for: Temporal brain transcriptome analysis reveals key pathological events after germinal matrix hemorrhage in neonatal rats
Source: PubMed Central journal article supplement (PMC9441725; doi:10.1177/0271678x221098811), 2022-05-01
Supplement: sj-pdf-10-jcb-10.1177_0271678X221098811.pdf [file sj-pdf-10-jcb-10.1177_0271678X221098811.pdf]

Table S1. Top 20 upregulated DEGs in GMH *versus* control at 6 hours after GMH.

| Gene     | Gene description                                | FC   | P-value adj | Function                                                          |
|----------|-------------------------------------------------|------|-------------|-------------------------------------------------------------------|
| Alox15   | Arachidonate 15-lipoxygenase                    | 26.8 | 1.1E-38     | Polyunsaturated fatty acid metabolism, inflammation, ferroptosis  |
| Hba-a2   | Hemoglobin alpha, adult chain 2                 | 37.6 | 3.6E-38     | Hemoglobin component                                              |
| Alas2    | Delta-aminolevulinate synthase 2                | 34.1 | 4.6E-33     | Heme biosynthesis                                                 |
| Hbb      | Hemoglobin beta chain complex                   | 46.0 | 5.5E-30     | Hemoglobin component                                              |
| Hba-a1   | Hemoglobin alpha, adult chain 1                 | 36.1 | 3.2E-28     | Hemoglobin component                                              |
| Ybx3     | Y box protein 3                                 | 1.7  | 1.1E-23     | DNA/RNA-binding, cell survival, proliferation, differentiation    |
| Slc25a39 | Solute carrier family 25. member 39             | 1.4  | 1.1E-14     | Amino acid transport, iron homeostasis                            |
| H4c8     | H4 clustered histone 8                          | 1.7  | 4.1E-14     | Core component of nucleosome                                      |
| Car2     | Carbonic anhydrase 2                            | 1.4  | 2.5E-13     | Hydration of carbon dioxide, heme biosynthesis, energy metabolism |
| Cdc25b   | Cell division cycle 25B                         | 1.4  | 3.0E-13     | Cell cycle progression                                            |
| Hmox1    | Heme oxygenase 1                                | 3.1  | 1.1E-12     | Heme catabolism, ferroptosis                                      |
| Gadd45g  | Growth arrest and DNA-damage-inducible 45 gamma | 1.5  | 1.3E-12     | Cell cycle control, DNA repair, apoptosis                         |
| Rbm38    | RNA binding motif protein 38                    | 1.9  | 1.0E-09     | Cell cycle control, mRNA stability                                |
| Junb     | Jun B proto-oncogene                            | 1.3  | 8.6E-09     | Transcription factor, cell cycle control, cell survival           |
| F3       | Coagulation factor III                          | 1.4  | 1.6E-08     | Initiate blood coagulation                                        |
| Hba-a3   | Hemoglobin alpha, adult chain 3                 | 47.4 | 1.1E-07     | Hemoglobin component                                              |
| Fech     | Ferrochelatase                                  | 1.2  | 1.1E-07     | Heme biosynthesis                                                 |
| Apln     | Apelin                                          | 1.4  | 5.7E-06     | Homeostatic regulation of body fluid                              |
| Egr1     | Early growth response protein 1                 | 1.4  | 1.1E-05     | Transcription factor, cell cycle control, differentiation         |
| Ucp2     | Mitochondrial uncoupling protein 2              | 1.4  | 4.7E-05     | Uncoupling of oxidative phosphorylation                           |

Fold change (FC) > 1.2. Sorted on adjusted p-value.

Table S2. Top 20 downregulated DEGs in GMH *versus* control at 6 hours after GMH.

| Gene   | Gene description                                        | FC   | p-value adj | Function                                                                      |
|--------|---------------------------------------------------------|------|-------------|-------------------------------------------------------------------------------|
| Klhl34 | Kelch-like family member 34                             | -1.2 | 2.4E-04     | Unknown                                                                       |
| Stk35  | Serine/threonine kinase 35                              | -1.2 | 7.7E-04     | Cell cycle control, cell migration                                            |
| Susd5  | Sushi domain containing 5                               | -1.4 | 1.1E-03     | Unknown                                                                       |
| Smcr8  | Smith-Magenis syndrome chromosome region candidate 8    | -1.2 | 6.5E-03     | Autophagy, guanine nucleotide exchange factor activity                        |
| Kcnh7  | Potassium voltage-gated channel member 7                | -1.3 | 6.5E-03     | Membrane potential regulation                                                 |
| Fat3   | FAT atypical cadherin 3                                 | -1.3 | 7.4E-03     | Neuronal morphology, interaction between neurites                             |
| Bach2  | BTB domain and CNC Homolog 2                            | -1.3 | 7.6E-03     | Immunity, apoptosis, negative regulator of Hmox1                              |
| Abca1  | ATP-binding cassette sub-family A member 1              | -1.2 | 1.7E-02     | Cholesterol and phospholipid homeostasis                                      |
| Shc3   | Src homology 2 domain containing transforming protein 3 | -1.2 | 1.8E-02     | Neuronal signaling                                                            |
| Fras1  | Fraser extracellular matrix complex subunit 1           | -1.2 | 1.9E-02     | Epidermal-basement membrane adhesion, organogenesis                           |
| Klf12  | Krueppel-like factor 12                                 | -1.2 | 2.7E-02     | Neural tube development, negatively regulates Enolas 2                        |
| Irs1   | Insulin receptor substrate 1                            | -1.2 | 2.8E-02     | Cell cycle progression, metabolism                                            |
| Rorb   | RAR related orphan receptor B                           | -1.2 | 3.1E-02     | Organogenesis, differentiation                                                |
| Tenm4  | Teneurin transmembrane protein 4                        | -1.2 | 3.2E-02     | Neuronal connectivity, axon guidance, oligodendrocyte development             |
| Kcna3  | Potassium voltage-gated channel subfamily A member 3    | -1.2 | 3.4E-02     | Neurotransmitter release, microglial activation, T-cell activation            |
| Thsd7a | Thrombospondin type 1 domain containing 7A              | -1.3 | 3.7E-02     | Cytoskeletal organization, cell migration, angiogenesis                       |
| Klhl11 | Kelch-like family member 11                             | -1.2 | 3.7E-02     | Predicted role in T-cell response                                             |
| Dab2   | Disabled homolog 2                                      | -1.2 | 3.7E-02     | Clathrin-mediated endocytosis, cell signaling, proliferation, differentiation |
| Igsf9b | Immunoglobulin Superfamily Member 9B                    | -1.3 | 4.1E-02     | Inhibitory synapse development                                                |
| Ino80d | Ino80 complex subunit D                                 | -1.3 | 4.6E-02     | Predicted role in transcriptional regulation, DNA replication and repair      |

Fold change (FC) < -1.2. Sorted on adjusted p-value.

Table S3. Top 20 upregulated DEGs in GMH *versus* control at 24 hours after GMH.

| Gene      | Gene description                                           | FC   | p-value adj | Function                                                         |
|-----------|------------------------------------------------------------|------|-------------|------------------------------------------------------------------|
| Hmox1     | Heme oxygenase 1                                           | 4.9  | 9.73E-16    | Heme catabolism, ferroptosis                                     |
| Lgals5    | Galectin 5                                                 | 12.1 | 2.18E-11    | Predicted role erythropoiesis, exosomal sorting                  |
| Hba-a1    | Hemoglobin alpha, adult chain 1                            | 9.6  | 7.21E-11    | Hemoglobin component                                             |
| Hbb       | Hemoglobin beta chain complex                              | 9.9  | 8.45E-11    | Hemoglobin component                                             |
| Hba-a2    | Hemoglobin alpha, adult chain 2                            | 10.0 | 5.57E-10    | Hemoglobin component                                             |
| Timp1     | TIMP metalloproteinase inhibitor 1                         | 1.6  | 1.20E-08    | Proliferation, cell cycle control, cell death, erythropoiesis    |
| Alas2     | Delta-aminolevulinate synthase 2                           | 6.6  | 4.77E-07    | Heme biosynthesis                                                |
| Mt2A      | Metallothionein 2A                                         | 1.8  | 4.77E-07    | Antioxidant, heavy metal toxicity protection                     |
| Alox15    | Arachidonate 15-lipoxygenase                               | 4.7  | 4.31E-06    | Polyunsaturated fatty acid metabolism, inflammation, ferroptosis |
| Cdk1      | Cyclin-dependent kinase 1                                  | 1.2  | 4.31E-06    | Cell cycle progression                                           |
| Tubb6     | Tubulin beta 6 chain                                       | 1.4  | 4.72E-06    | Cell cycle, microtubule component, mitotic spindle component     |
| Ifitm3    | Interferon-induced transmembrane protein 3                 | 1.6  | 2.01E-05    | Immune response, disrupt cholesterol homeostasis                 |
| Pttg1     | PTTG1 regulator of sister chromatid separation, Securin    | 1.3  | 2.17E-05    | Control of the metaphase-anaphase transition                     |
| Denn2b    | DENN domain containing 2B                                  | 1.3  | 3.05E-05    | Cytoskeletal organization, cell migration                        |
| Fcgr3a    | Low affinity immunoglobulin gamma Fc region receptor III-A | 1.8  | 7.40E-05    | Antibody-dependent natural killer cell-mediated cytotoxicity     |
| Bin2      | Bridging integrator 2                                      | 1.4  | 1.36E-04    | Cell motility and migration                                      |
| Ccnb1     | Cyclin B1                                                  | 1.2  | 1.36E-04    | Cell cycle progression                                           |
| Arhgap11a | Rho GTPase-activating protein 11A                          | 1.2  | 3.87E-04    | Cell cycle-dependent motility                                    |
| Cd63      | CD63 molecule                                              | 1.2  | 1.35E-03    | Cell growth and motility, marker for platelet activation         |
| Cdca8     | Cell division cycle associated 8                           | 1.2  | 1.46E-03    | Cell cycle, microtubule stabilization and spindle formation      |

Fold change (FC) > 1.2. Sorted on adjusted p-value.

Table S4. Top 20 downregulated DEGs in GMH *versus* control at 24 hours after GMH.

| Gene   | Gene description                                            | FC   | p-value adj | Function                                                                   |
|--------|-------------------------------------------------------------|------|-------------|----------------------------------------------------------------------------|
| Hcfc1  | Host cell factor 1                                          | -1.3 | 3.0E-05     | Cell cycle control                                                         |
| Clstn2 | Calsyntenin 2                                               | -1.2 | 1.5E-04     | Predicted role in postsynaptic signaling                                   |
| Ndst1  | N-Deacetylase and N-sulfotransferase 1                      | -1.2 | 8.2E-04     | Heparan sulfate biosynthesis, inflammation                                 |
| Prrc2b | Proline rich coiled-coil 2B                                 | -1.2 | 8.3E-04     | Predicted to have a role in cell differentiation and neurodevelopment      |
| Ttbk2  | Tau tubulin kinase 2                                        | -1.2 | 1.9E-03     | Microtubule stabilization in neurons, cell cycle control, ciliogenesis     |
| Mecp2  | Methyl-CpG binding protein 2                                | -1.3 | 1.9E-03     | Chromatin structure, neurodevelopment                                      |
| Hip1r  | Huntingtin-interacting protein 1-related protein            | -1.2 | 3.8E-03     | Intracellular vesicle trafficking, dendritic growth and branching          |
| Pitpm2 | Phosphatidylinositol transfer protein membrane associated 2 | -1.3 | 5.1E-03     | Phospholipid biosynthesis and metabolism                                   |
| Fat3   | FAT atypical cadherin 3                                     | -1.2 | 5.3E-03     | Neuronal morphology, interaction between neurites                          |
| Tenm4  | Teneurin transmembrane protein 4                            | -1.2 | 7.6E-03     | Neuronal connectivity, axon guidance, oligodendrocyte development          |
| Abcb9  | ATP binding cassette subfamily B member 9                   | -1.2 | 8.0E-03     | Peptide transport, peptide degradation, antigen processing                 |
| Mib1   | MIB E3 ubiquitin protein ligase 1                           | -1.3 | 1.0E-02     | Ubiquitination, apoptosis, cell cycle control                              |
| Fbxl12 | F-box and leucine rich repeat protein 12                    | -1.2 | 1.1E-02     | Ubiquitination, cell cycle control                                         |
| Fbxl18 | F-box and leucine rich repeat protein 18                    | -1.2 | 1.5E-02     | Ubiquitination, cell cycle control                                         |
| Sv2c   | Synaptic vesicle glycoprotein 2C                            | -1.3 | 1.8E-02     | Neurotransmission, vesicle fusion                                          |
| Tnr    | Tenascin R                                                  | -1.2 | 1.9E-02     | Neurite outgrowth, cell adhesion, differentiation, sodium channel function |
| Egr4   | Early growth response protein 4                             | -1.2 | 2.1E-02     | Mitogenesis, differentiation                                               |
| Fbxo32 | F-box protein 32                                            | -1.3 | 2.3E-02     | Ubiquitination, cell cycle control, apoptosis                              |
| Myo5a  | Myosin VA                                                   | -1.2 | 2.4E-02     | Vesicle transport, action potential, spindle pole formation                |
| Ksr2   | Kinase suppressor of Ras 2                                  | -1.3 | 2.4E-02     | Fatty acid oxidation, cell growth, energy- and glucose homeostasis         |

Fold change (FC) < -1.2. Sorted on adjusted p-value.

Table S5. Top 20 upregulated DEGs in GMH *versus* control at 72 hours after GMH.

| Gene    | Gene description                                         | FC   | p-value adj | Function                                                                    |
|---------|----------------------------------------------------------|------|-------------|-----------------------------------------------------------------------------|
| Hmox1   | Heme oxygenase 1                                         | 11.8 | 2.4E-65     | Heme catabolism, ferroptosis                                                |
| Mir675  | microRNA 675                                             | 15.5 | 3.1E-50     | Proliferation, apoptosis, cell migration                                    |
| Lgals3  | Galectin 3                                               | 11.2 | 2.1E-45     | Inflammation, apoptosis, cell adhesion, migration                           |
| Gpnmb   | Glycoprotein Nmb                                         | 5.8  | 1.5E-35     | Inflammation, proliferation, differentiation                                |
| Abca1   | ATP-Binding cassette sub-family A member 1               | 1.9  | 2.5E-32     | Cholesterol and phospholipid homeostasis                                    |
| Ctsd    | Cathepsin D                                              | 1.4  | 1.1E-23     | Lysosomal recycling of substrates, apoptosis, autophagy, inflammation       |
| Plau    | Plasminogen activator, Urokinase                         | 3.8  | 8.0E-23     | Converts plasminogen into plasmin, promotes dissolution of blood coagulates |
| Cd68    | CD68 molecule                                            | 3.1  | 4.1E-22     | Lysosomal metabolism, phagocytosis, inflammation                            |
| Pla2g7  | Phospholipase A2 group VII                               | 2.8  | 4.5E-22     | Degradation of platelet-activating factor                                   |
| Spp1    | Secreted phosphoprotein 1, Osteopontin                   | 8.9  | 3.5E-21     | Immune response, chemokine, cell activation, apoptosis                      |
| Megf10  | Multiple epidermal growth factor-like domains protein 10 | 1.5  | 1.3E-20     | Cell adhesion, motility, proliferation, apoptotic cell phagocytosis         |
| Slc11a1 | Solute carrier family 11 member 1                        | 2.9  | 4.3E-19     | Iron metabolism, inflammation                                               |
| Bin2    | Bridging integrator 2                                    | 1.8  | 4.2E-18     | Cell motility and migration                                                 |
| Pdlim4  | PDZ and LIM domain 4                                     | 1.6  | 7.6E-18     | Cell migration                                                              |
| Cfh     | Complement factor H                                      | 1.9  | 1.8E-17     | Regulation of complement activation                                         |
| Myo1f   | Myosin 1F                                                | 2.3  | 2.3E-17     | Intracellular movements, actin cytoskeletal dynamics, cell migration        |
| Grn     | Granulin precursor                                       | 1.4  | 2.4E-17     | Cell growth, cell survival, proliferation, inflammation                     |
| Erbin   | ErbB2 interacting protein                                | 1.2  | 2.4E-17     | Cell growth, cell survival, proliferation                                   |
| Fabp4   | Fatty acid binding protein 4                             | 6.6  | 1.5E-16     | Fatty acid transport and metabolism                                         |
| Ncf1    | Neutrophil cytosolic factor 1                            | 2.9  | 5.4E-16     | Superoxide production, inflammation                                         |

Fold change (FC) > 1.2. Sorted on adjusted p-value.

Table S6. Top 20 downregulated DEGs in GMH *versus* control at 72 hours after GMH.

| Gene    | Gene description                                 | FC   | p-value adj | Function                                                                  |
|---------|--------------------------------------------------|------|-------------|---------------------------------------------------------------------------|
| Klhl32  | Kelch like family member 32                      | -1.2 | 8.3E-06     | Unknown                                                                   |
| Mvd     | Mevalonate diphosphate decarboxylase             | -1.2 | 1.9E-05     | Mevalonate pathway, cholesterol biosynthesis                              |
| Alas1   | 5'-Aminolevulinate synthase 1                    | -1.2 | 2.2E-05     | Heme biosynthesis                                                         |
| Idi1    | Isopentenyl-diphosphate delta isomerase 1        | -1.2 | 3.4E-05     | Mevalonate pathway, cholesterol biosynthesis                              |
| Tm7sf2  | Transmembrane 7 superfamily member 2             | -1.2 | 3.5E-05     | Mevalonate pathway, cholesterol biosynthesis                              |
| Rbmx11b | RNA-binding motif protein, X-linked-like 1B      | -1.2 | 1.8E-04     | Unknown                                                                   |
| Hes7    | Hes family BHLH transcription factor 7           | -1.2 | 1.1E-03     | Notch-signaling, somitogenesis, neurodevelopment                          |
| Qpct    | Glutaminyl-peptide cyclotransferase              | -1.2 | 2.6E-03     | Cyclic glutamyl peptide biosynthesis                                      |
| Nefm    | Neurofilament medium chain                       | -1.2 | 3.0E-03     | Component of the axoskeleton                                              |
| Tpsab1  | Tryptase alpha/beta 1                            | -2.5 | 3.6E-03     | Inflammation, expressed by mast cells, extracellular matrix degradation   |
| Tpsb2   | Tryptase beta 2                                  | -2.1 | 3.6E-03     | Inflammation, expressed by mast cells, extracellular matrix degradation   |
| Rtl3    | Retrotransposon Gag like 3                       | -4.1 | 4.1E-03     | Retrotransposon-derived transcript                                        |
| Vstm2l  | V-set and transmembrane domain containing 2 like | -1.2 | 4.7E-03     | Cell adhesion, neuronal viability                                         |
| Casp6   | Caspase 6                                        | -6.4 | 4.7E-03     | Apoptosis, immune response                                                |
| Prkch   | Protein kinase C eta                             | -1.2 | 6.3E-03     | Cell proliferation, differentiation, cell death, activated by cholesterol |
| Kiss1r  | KISS1 receptor                                   | -1.2 | 6.5E-03     | Neuroendocrine regulation, sensing of metabolic cues                      |
| Gjc2    | Gap junction gamma 2                             | -1.4 | 8.1E-03     | Myelination, cell adhesion                                                |
| Acat2   | Acetyl-CoA acetyltransferase 2                   | -1.2 | 8.5E-03     | Mevalonate pathway, cholesterol biosynthesis                              |
| Elov6   | ELOVL fatty acid elongase 6                      | -1.9 | 1.1E-02     | Mevalonate pathway, cholesterol biosynthesis                              |
| Agtr2   | Angiotensin II receptor type 2                   | -1.6 | 1.3E-02     | Apoptosis, inflammation                                                   |

Fold change (FC) < -1.2. Sorted on adjusted p-value.
